# Supplementary material for: One-step production of N–O–P–S co-doped porous carbon from bean worms for supercapacitors with high performance
Source: Royal Society of Chemistry journal article supplement (doi:10.1039/d0ra05870j), 2020-01-01
Supplement: d0ra05870j1.pdf [file d0ra05870j1.pdf]

## Electronic Supplementary Information

### **One-step production of N-O-P-S co-doped porous carbon from Bean worm for supercapacitors with high performance†**

Zhentao Bian,<sup>\*a,b</sup> Chunjie Wu,<sup>a</sup> Chenglong Yuan,<sup>a</sup> Ying Wang,<sup>a</sup>  
Guangzhen Zhao,<sup>a</sup> Hongyan Wang,<sup>a</sup> Yong Xie,<sup>a,b</sup> Cong Wang,<sup>a</sup> Guang  
Zhu<sup>a</sup> and Chong Chen<sup>\*a</sup>

<sup>a</sup> Anhui Key Laboratory of Spin Electron and Nanomaterials (Cultivating Base), School of Chemistry and Chemical Engineering, Suzhou University, Suzhou 234000, PR China

<sup>b</sup> Institute of fine chemical products development, Suzhou University, Suzhou 234000, PR China

\*Corresponding author:

E-mail: zhentaobian@126.com (Zhentao Bian);

chongchen\_li@163.com (Chong Chen)

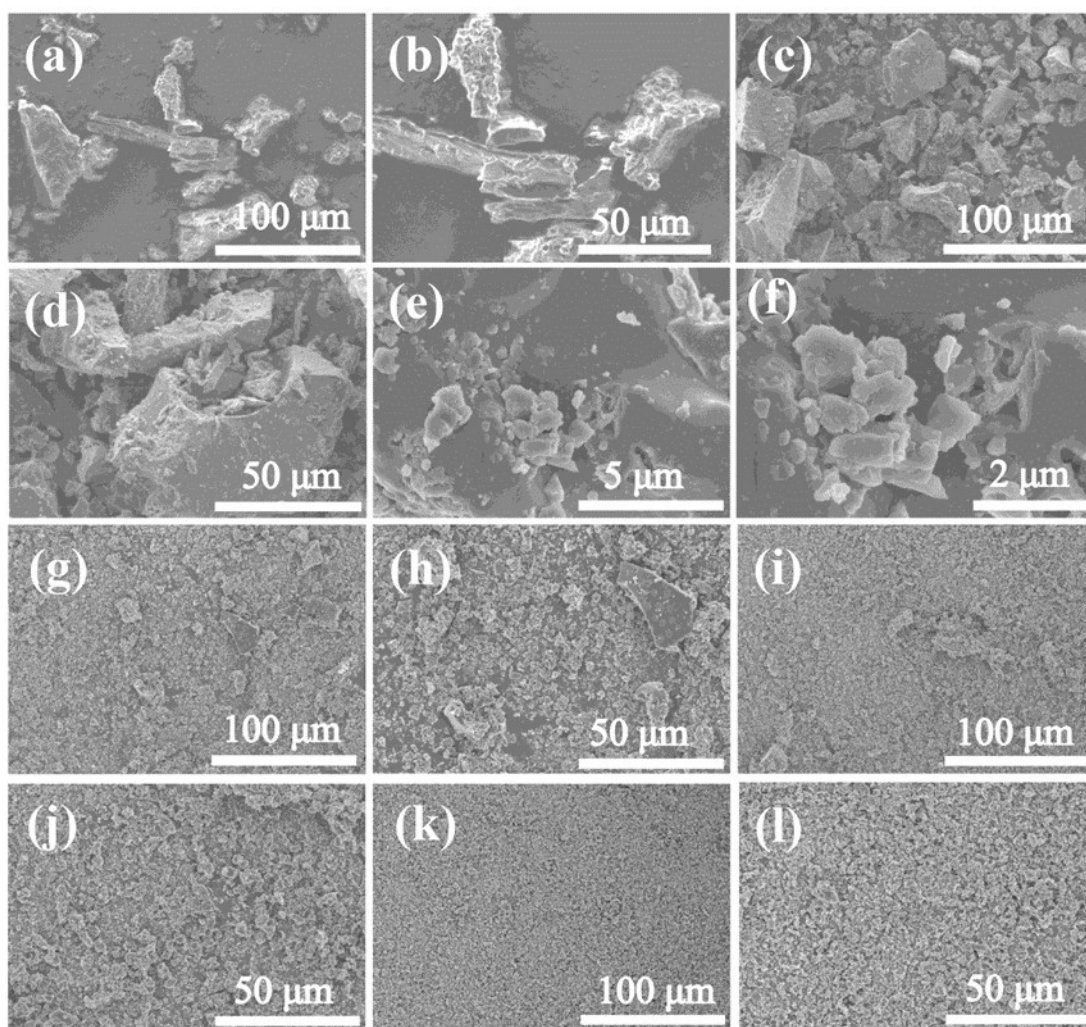

**Fig. S1** SEM images of (a, b) precursor, (c, d, e, f) BWC, (g, h) BWPC<sub>1/4</sub>, (i, j) BWPC<sub>1/3</sub> and (k, l) BWPC<sub>1/2</sub>.

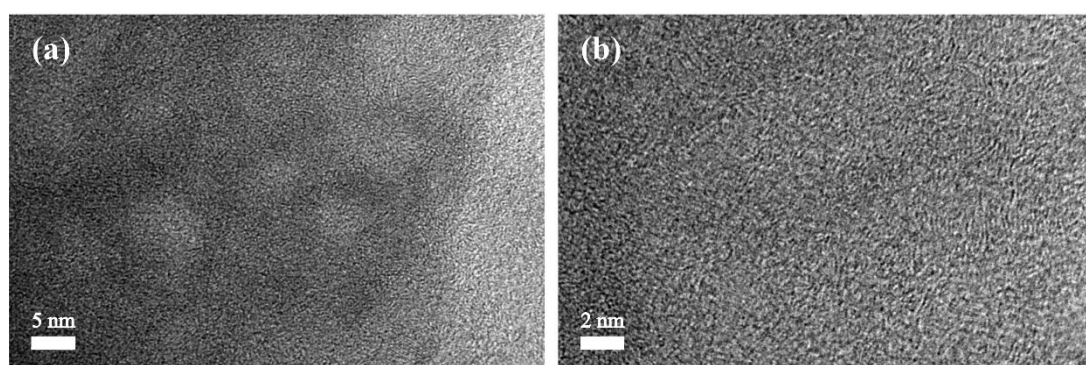

**Fig. S2** High-resolution transmission electron microscopy (HRTEM) images of BWPC<sub>1/3</sub>.

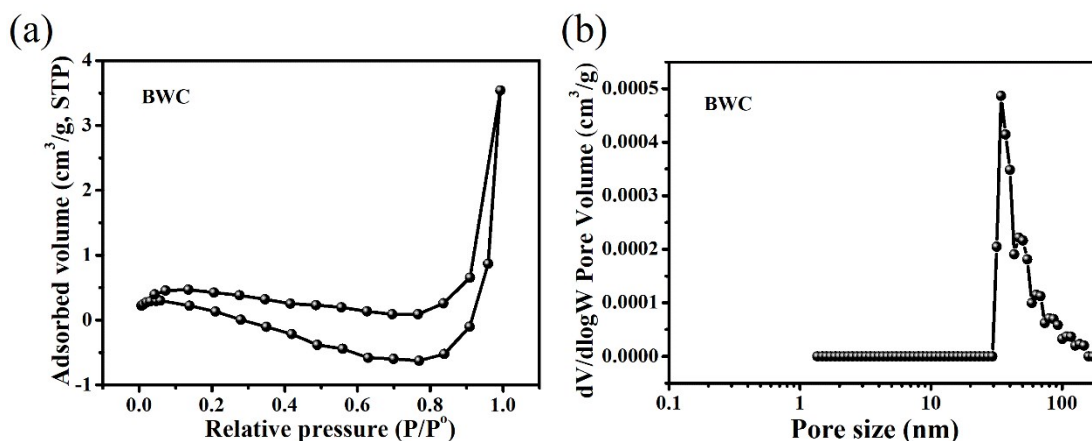

**Fig. S3** (a) Nitrogen adsorption-desorption isotherms and (d) pore size distributions of BWC.

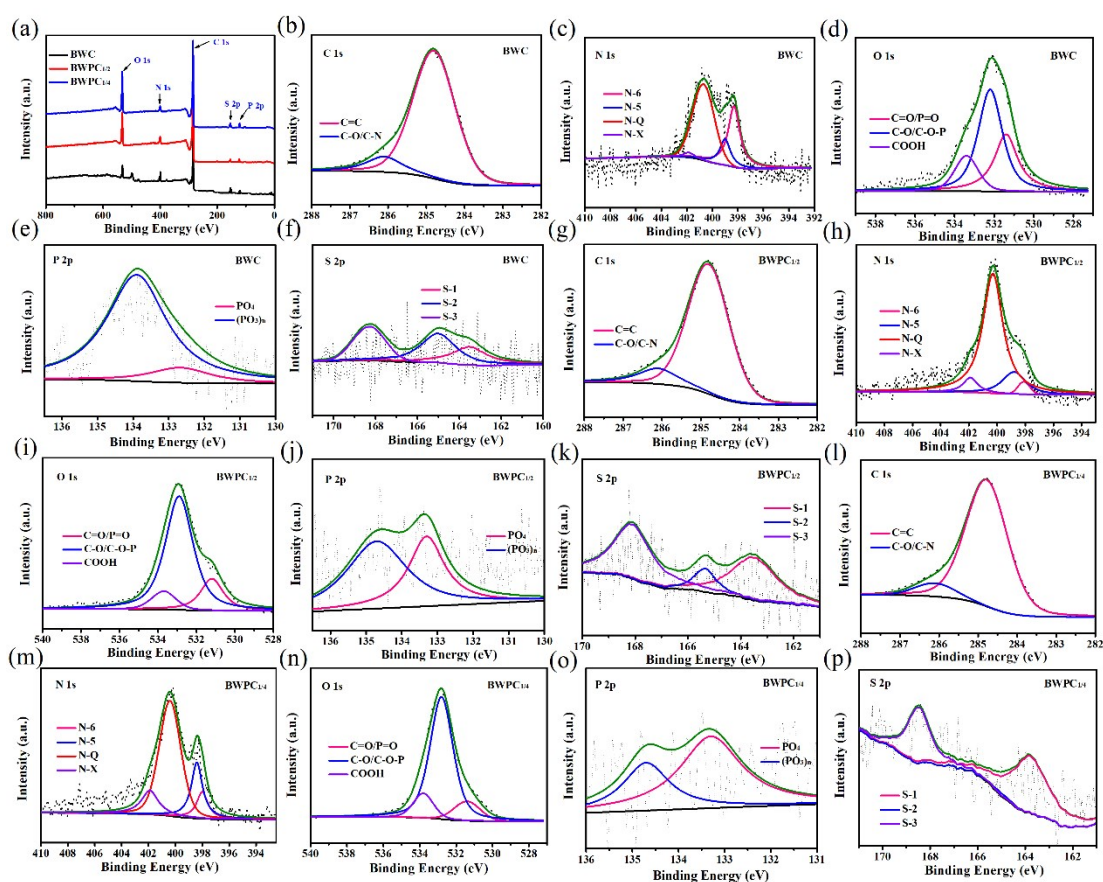

**Fig. S4** XPS spectra (a) and deconvoluted C 1s spectra (b, g, l), N 1s spectra (c, h, m) O 1s spectra (d, i, n), P 2p spectra (e, j, o) and S 2p (f, k, p) of BWC, BWPC<sub>1/2</sub> and BWPC<sub>1/4</sub>.

**Table S1** The elemental content of C, N, O, P, and S in BWC and BWPCs.

| Sample                          | BWC   | BWPC <sub>1/4</sub> | BWPC <sub>1/3</sub> | BWPC <sub>1/2</sub> |
|---------------------------------|-------|---------------------|---------------------|---------------------|
| C species                       |       | Content (at. %)     |                     |                     |
| C=C                             | 88.52 | 91.68               | 87.53               | 87.0                |
| C-O/C-N                         | 11.48 | 8.32                | 12.47               | 13.0                |
| N species                       |       | Content (at. %)     |                     |                     |
| N-6                             | 33.36 | 9.5                 | 6.2                 | 3.25                |
| N-5                             | 12.96 | 19.72               | 36.25               | 15.02               |
| N-Q                             | 51.37 | 58.19               | 50.18               | 75.05               |
| N-X                             | 2.31  | 12.6                | 7.38                | 6.67                |
| O species                       |       | Content (at. %)     |                     |                     |
| C=O/P=O                         | 32.37 | 11.59               | 11.41               | 17.93               |
| C-O/ C-O-P                      | 52.3  | 76.11               | 76.93               | 72.87               |
| C-OOH                           | 15.33 | 12.3                | 11.66               | 9.2                 |
| P species                       |       | Content (at. %)     |                     |                     |
| PO <sub>4</sub>                 | 12.0  | 66.67               | 34.48               | 40.0                |
| (PO <sub>3</sub> ) <sub>n</sub> | 88.0  | 33.33               | 65.52               | 60.0                |
| S species                       |       | Content (at. %)     |                     |                     |
| S-1                             | 27.4  | 62.75               | 16.52               | 41.21               |
| S-2                             | 41.1  | 1.96                | 37.43               | 11.18               |
| S-3                             | 31.5  | 35.29               | 46.05               | 47.6                |

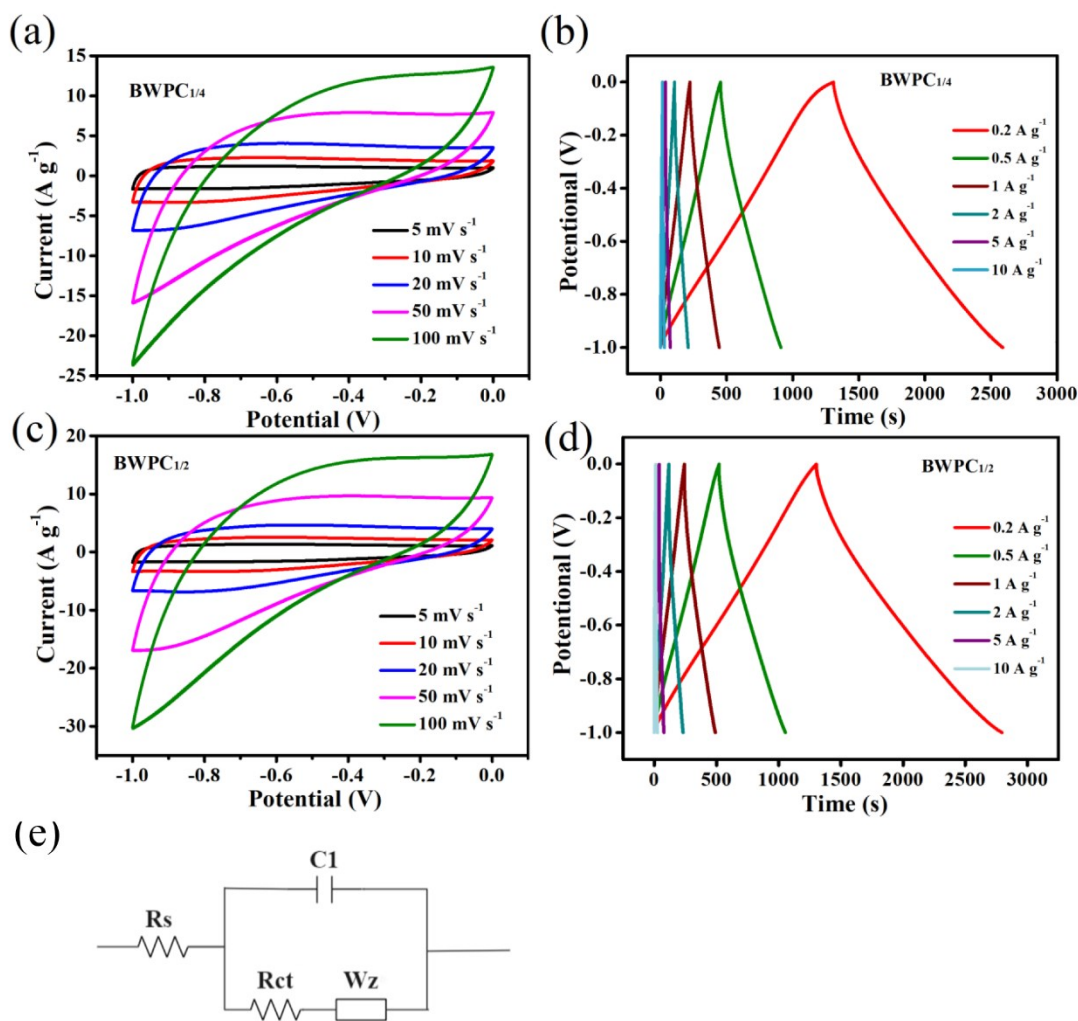

**Fig. S5** Cyclic voltammograms curves for carbon electrodes obtained at the indicated conditions: (a) BWPC<sub>1/4</sub> and (c) BWPC<sub>1/2</sub>. Galvanostatic charge-discharge curve for carbon electrodes obtained at the indicated conditions: (b) BWPC<sub>1/4</sub> and (d) BWPC<sub>1/2</sub>. (e) equivalent circuit.

**Table S2** Electrochemical features of BW-derived porous carbon supercapacitor.

| Sample              | Specific capacitance<br>(C, F g <sup>-1</sup> ) | R <sub>s</sub> (Ω) | R <sub>ct</sub> (Ω) | Energy density<br>(E/Wh kg <sup>-1</sup> ) | Power density<br>(P/W kg <sup>-1</sup> ) |
|---------------------|-------------------------------------------------|--------------------|---------------------|--------------------------------------------|------------------------------------------|
| BWC                 | -                                               | 0.87               | 22.01               | -                                          | -                                        |
| BWPC <sub>1/4</sub> | 221.4 at 1A g <sup>-1</sup>                     | 0.81               | 7.75                | -                                          | -                                        |
| BWPC <sub>1/3</sub> | 313.8 at 1A g <sup>-1</sup>                     | 0.76               | 3.11                | 27.5                                       | 200                                      |
| BWPC <sub>1/2</sub> | 242.1 at 1A g <sup>-1</sup>                     | 0.84               | 5.46                | -                                          | -                                        |
